# Supplementary material for: Is AI essential? Examining the need for deep learning in image-activated sorting of Saccharomyces cerevisiae
Source: Royal Society of Chemistry journal article supplement (doi:10.1039/d3lc00556a), 2023-01-01
Supplement: d3lc00556a1.pdf [file d3lc00556a1.pdf]

## Supplementary Information

5 **Note 1. Derivation of the relation between enrichment ratio, initial target population, and classifier performance.**

The enrichment ratio  $E$  is defined by

$$E = \frac{y}{x},$$

where  $x$  and  $y$  are the initial target cell proportion and the proportion of target cells after enrichment, respectively.

10 The proportion after enrichment  $y$  can be calculated by

$$y = \frac{TPR x}{TPR x + FPR(1-x)},$$

where  $TPR$  and  $FPR$  are the true positive rate and false positive rate of a given classifier, respectively. By substituting  $y$ , the enrichment ratio  $E$  can be expressed as

$$\begin{aligned} E &= \frac{TPR x}{TPR x + FPR(1-x)} \frac{1}{x} \\ &= \frac{1}{x + \frac{FPR}{TPR}(1-x)}. \end{aligned}$$

15

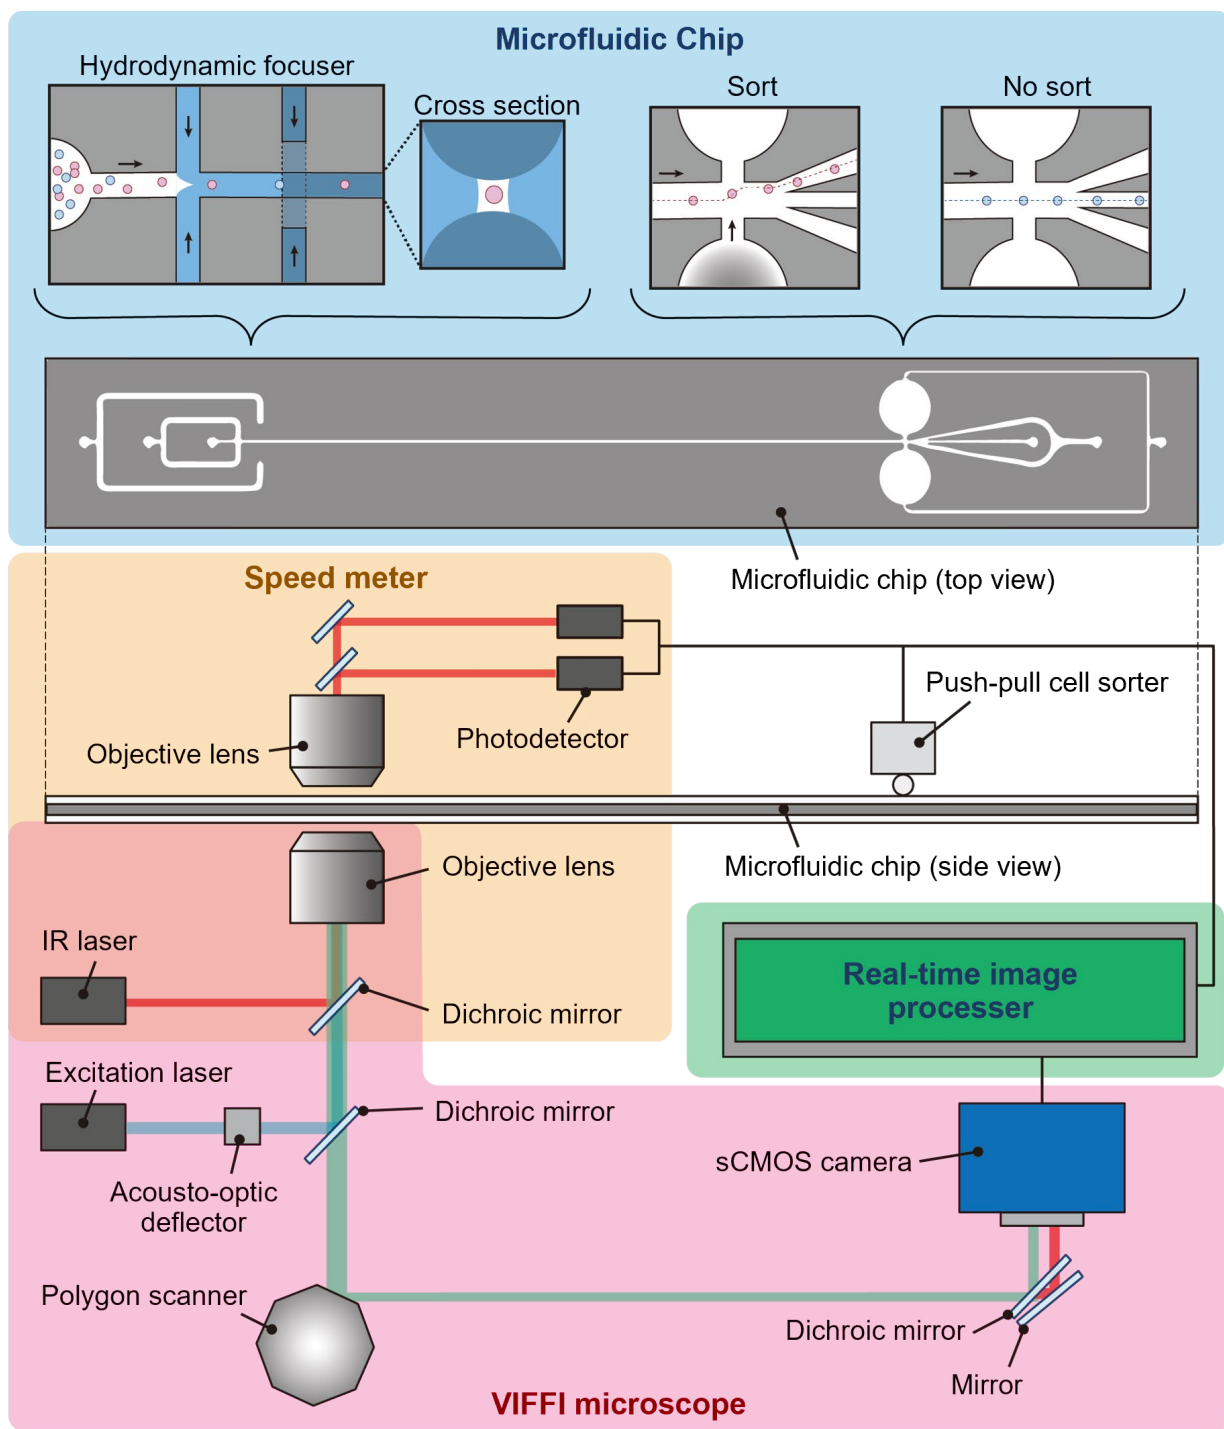

**Fig. S1. Simplified schematic of the iACS 2.0 system.** The four main parts of the iACS 2.0 system<sup>23</sup> are depicted: the microfluidic chip (blue), the speed meter (orange), the virtual-freezing fluorescence imaging (VIFFI)<sup>17</sup> microscope (pink), and the real-time image processor (green). sCMOS, scientific complementary metal-oxide semiconductor; IR, infrared.

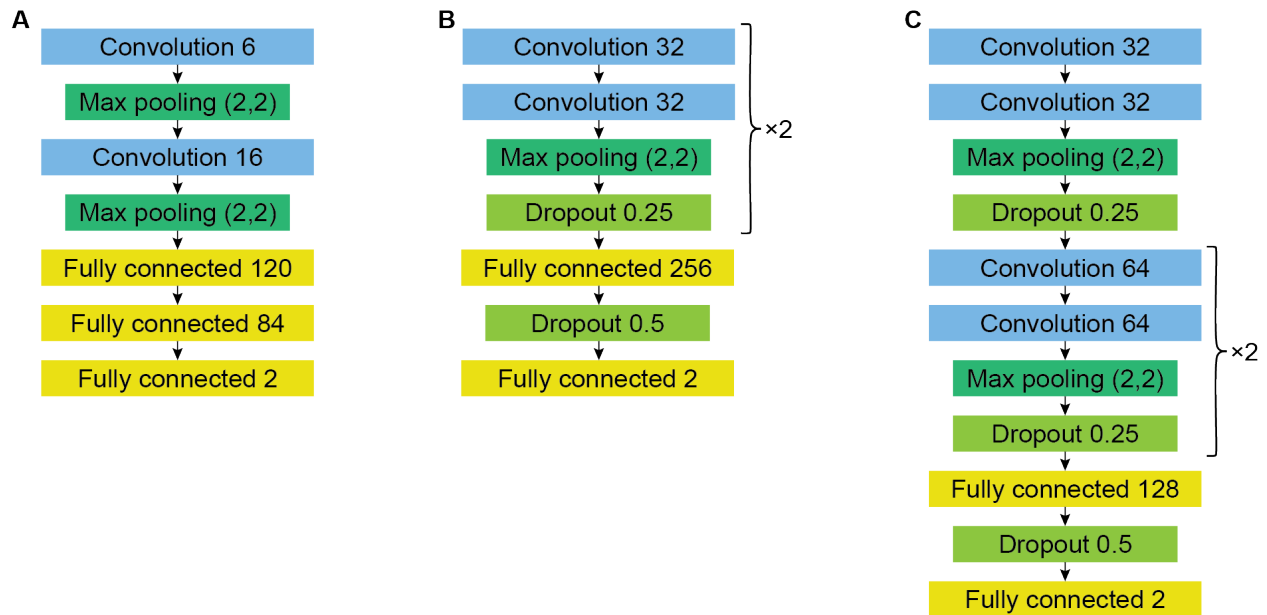

**Fig. S2. CNN structure.** (A) Structure of the LeNet-5 classifier.<sup>48</sup> (B) Structure of the DeepCNN-6 classifier.<sup>21</sup> (C) Structure of the DeepCNN-8 classifier.<sup>21</sup>

5

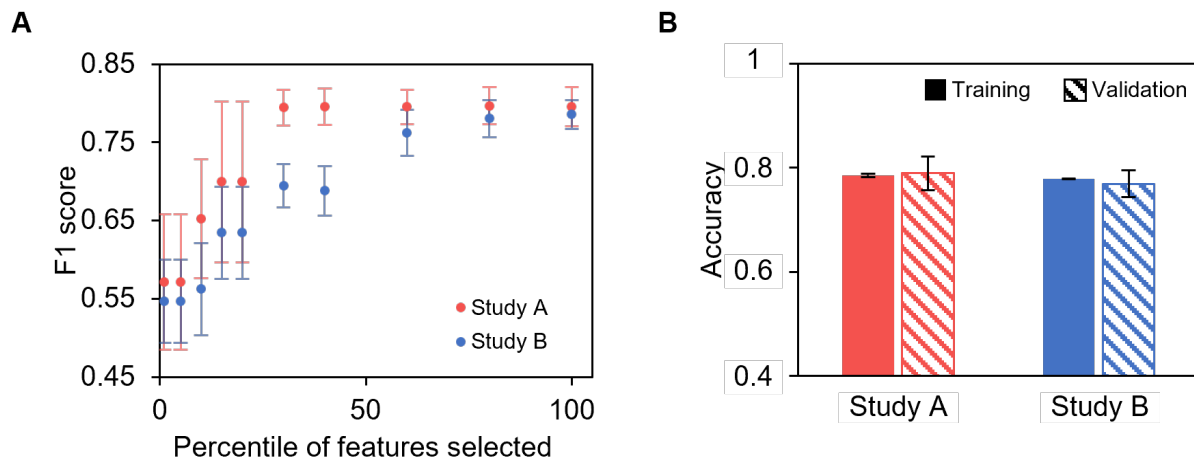

**Fig. S3. ML classifier training and validation accuracies and feature number dependence.** (A) Average F1 scores of the optimized NuSVC trained on various percentiles of features selected based on analysis of variance (ANOVA) F-values. Models were trained with 5-fold cross validation. (B) Average training and validation accuracies of the optimized NuSVCs trained on full feature datasets with 5-fold cross validation.

10

**Table S1. List of extracted features and respective importance rankings.** Descriptions of all features are available in CellProfiler<sup>39</sup> documentation for the MeasureObjectSizeShape module.

| <b>Feature name</b> | <b>Brief description</b>                                                                                                             | <b>Study A importance ranking</b> | <b>Study B importance ranking</b> |
|---------------------|--------------------------------------------------------------------------------------------------------------------------------------|-----------------------------------|-----------------------------------|
| Area                | The number of pixels in the object                                                                                                   | 0.00435                           | 0.00290                           |
| Perimeter           | The number of pixels around the boundary of each object                                                                              | 0.00701                           | 0.00548                           |
| MajorAxisLength     | The length (pixels) of the major axis of an ellipse with the same normalized second central moments as the object                    | 0.109                             | 0.0847                            |
| MinorAxisLength     | The length (pixels) of the minor axis of an ellipse with the same normalized second central moments as the object                    | 0.327                             | 0.00188                           |
| Eccentricity        | The ratio of the distance between the foci and its major axis length of an ellipse with the same second moments as the object        | 0.325                             | 0.0266                            |
| BoundingBoxArea     | The area of a box containing the object                                                                                              | 0.00527                           | 0.0107                            |
| FormFactor          | A measure of object circularity where a value of 1 denotes a perfectly circular object                                               | 0.0208                            | 0.00151                           |
| Extent              | The proportion of the pixels in a box containing the object that are also within the object                                          | 0.0326                            | 0.00649                           |
| Solidity            | The proportion of the pixels in the convex hull of an object that are also within the object                                         | 0.0201                            | 0.0537                            |
| Compactness         | A measure of object deformation where a filled circle would have a value of 1 and irregular objects would have values greater than 1 | 0.0198                            | 0.00801                           |
| MaximumRadius       | The maximum distance between any pixel within the object to the closest pixel outside of the object                                  | 0.0763                            | 0.0179                            |
| MeanRadius          | The mean distance of any pixel within the object to the closest pixel outside of the object                                          | 0.0262                            | 0.708                             |
| ConvexArea          | The number of pixels in the convex hull of an object                                                                                 | 0.00613                           | 0.00184                           |
| MinFerretDiameter   | The minimum distance between two parallel lines tangent drawn on either side of the object along all possible angles                 | 0.00871                           | 0.0589                            |
| MaxFerretDiameter   | The maximum distance between two parallel lines tangent drawn on either side of the object along all possible angles                 | 0.00983                           | 0.00907                           |
| EquivalentDiameter  | The diameter of a circle with the same area as the object                                                                            | 0.00148                           | 0.00210                           |
